# Supplementary material
Source: PubMed Central journal article supplement (PMC11613609)

291029 chr X

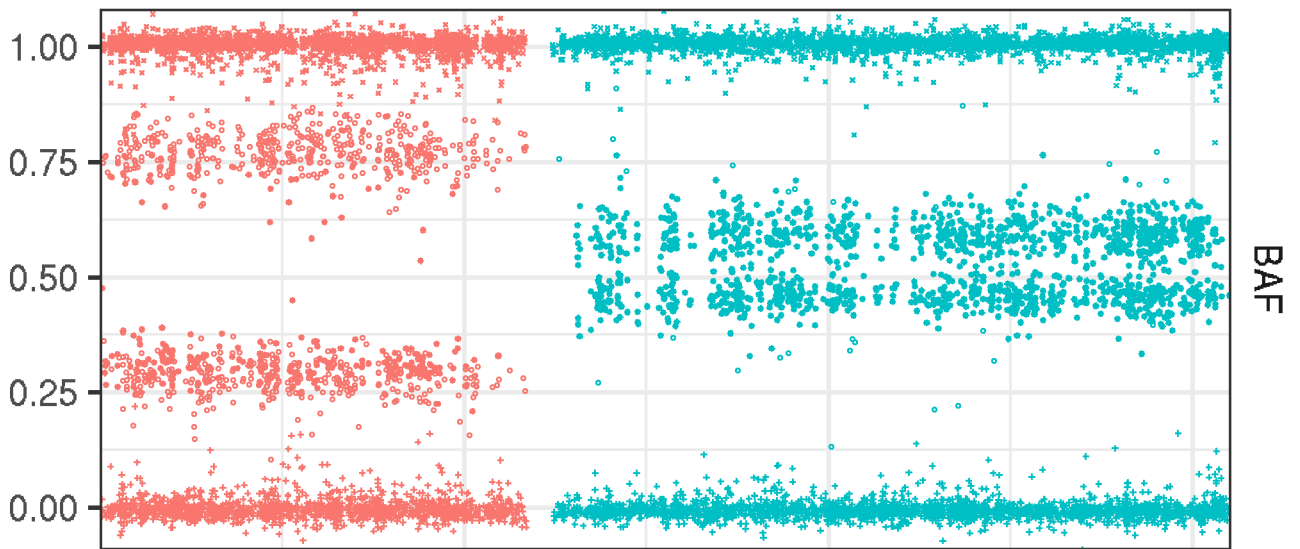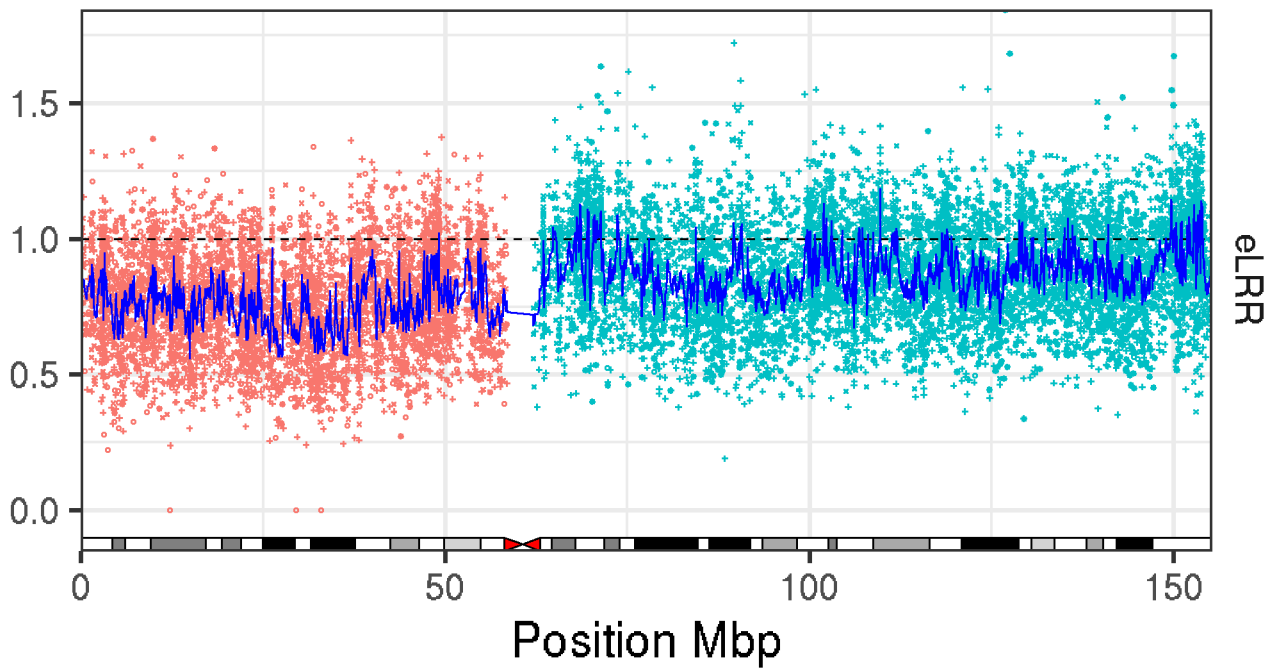

Supplement: mmc1.pdf [file mmc1.pdf]
