# Supplementary material
Source: PubMed Central journal article supplement (PMC11613609)

287432 chr 6

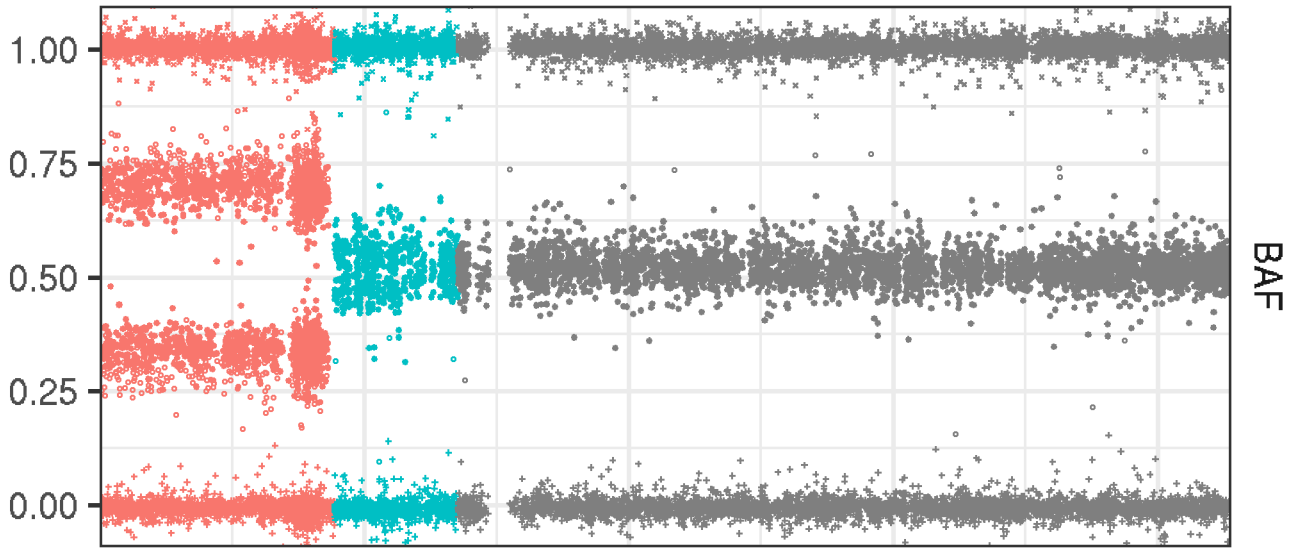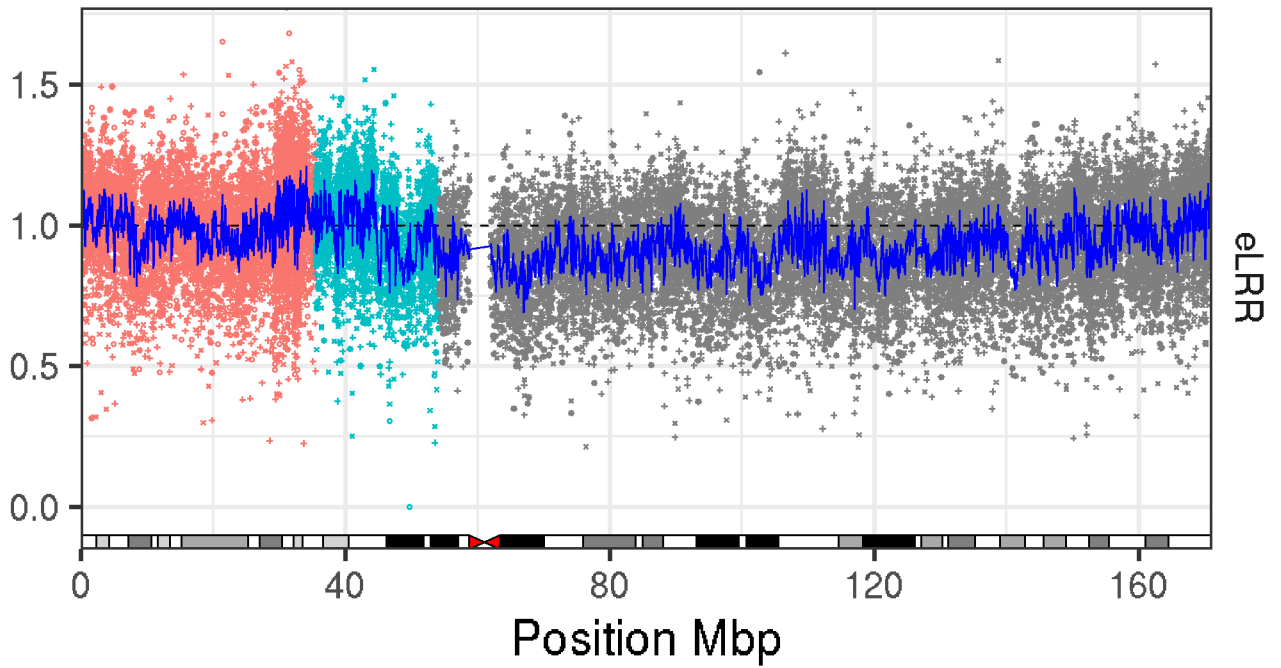

Supplement: mmc2.pdf [file mmc2.pdf]
